# Supplementary material
Source: PubMed Central journal article supplement (PMC4020112)
Supplement: 1405079111_pnas.201405079SI.pdf [file 1405079111_pnas.201405079SI.pdf]

# Supporting Information

Hochstrasser et al. 10.1073/pnas.1405079111

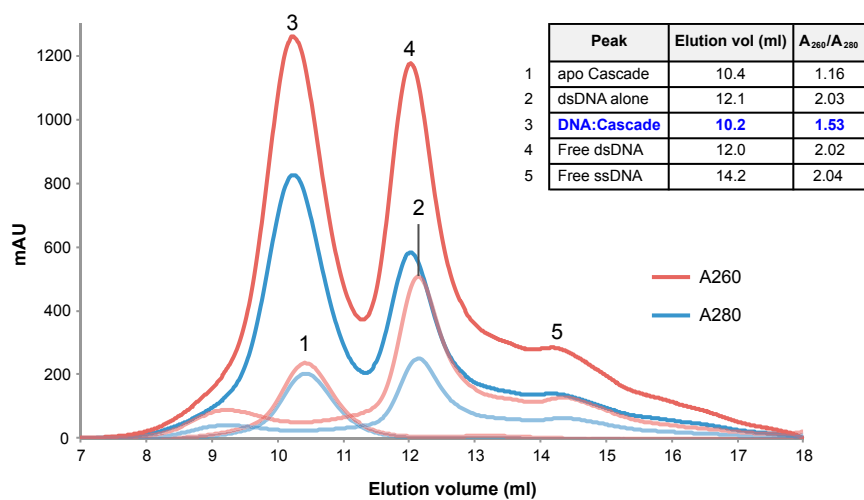

**Fig. S1.** Size-exclusion run to remove unbound DNA after reconstituting DNA–Cascade (CRISPR-associated complex for antiviral defense; CRISPR, clustered regularly interspaced short palindromic repeats) for EM. Cascade was incubated with a 2× molar excess of target dsDNA at 37 °C before injection onto a Superdex 200 size-exclusion column. Free DNA elutes at about 12 mL and is easily separable from DNA–Cascade, which elutes after 10.4 mL. This peak was pooled, concentrated, and analyzed by cryoEM. mAU, milliabsorbance units.

**A** Raw cryo-EM micrograph of dsDNA–Cascade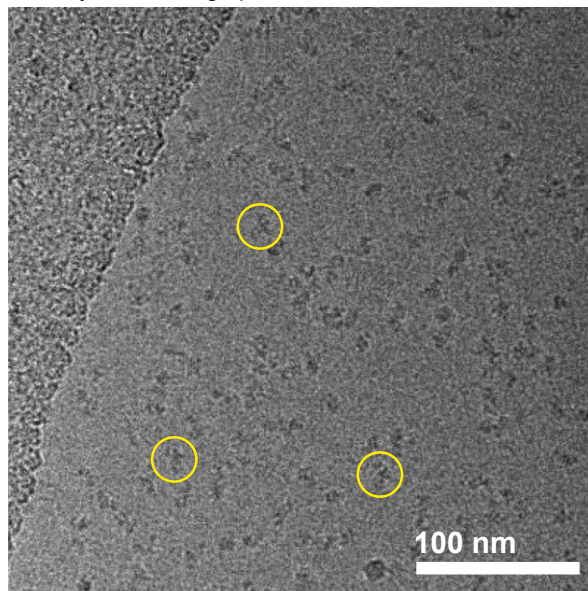**B** Reference-free 2D class averages of dsDNA–Cascade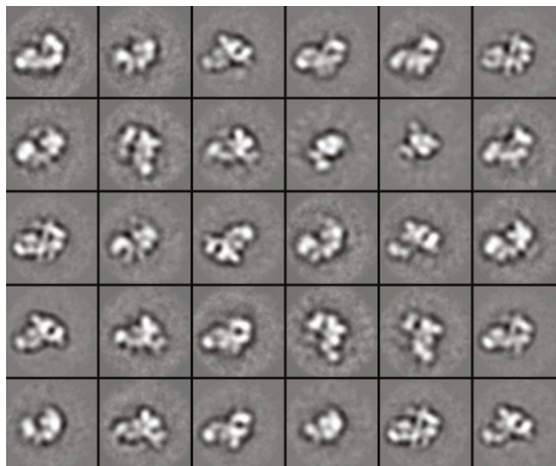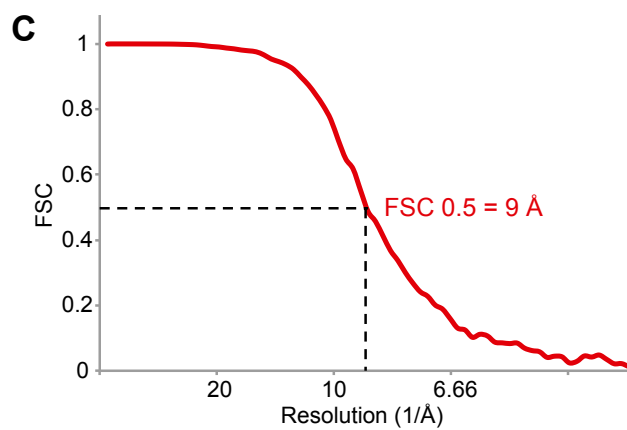

**Fig. S2.** Molecular architecture of dsDNA-bound Cascade. (A) Raw cryoEM micrograph of dsDNA-bound Cascade. (Scale bar, 100 nm.) (B) Representative reference-free 2D class averages of dsDNA-bound Cascade. The width of the boxes is  $\sim 314$  Å. (C) Fourier shell correlation (FSC) curve for the final reconstruction, showing the resolution to be  $\sim 9$  Å using the 0.5 FSC criterion.

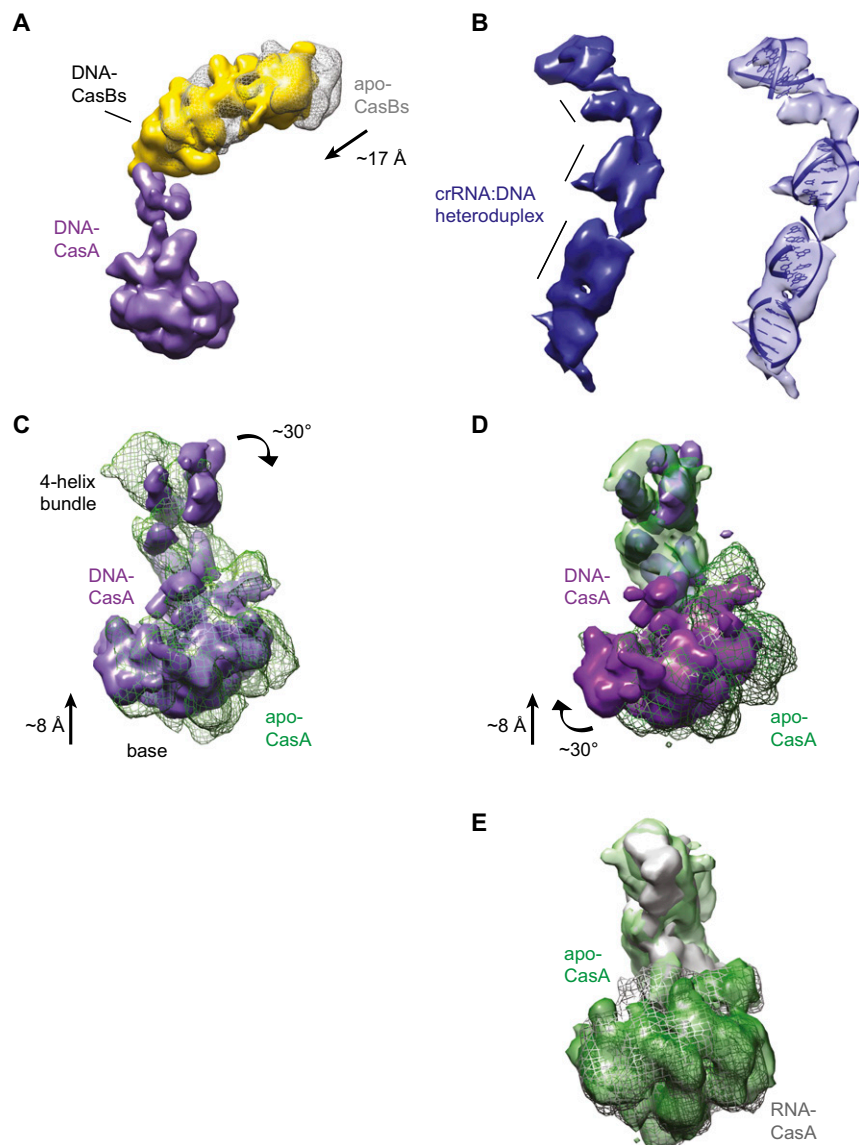

**Fig. S3.** Comparison of subunits between Cascade structures. (A) CasB1 and CasB2 from the dsDNA-bound Cascade (DNA-CasBs, yellow) overlaid on CasB1 and CasB2 from apo-Cascade (apo-CasBs, gray mesh) after alignment based on optimal cross-correlation between the CasC backbones of the two structures. The arrow denotes translation of the DNA-CasBs relative to apo-CasBs. CasA from the dsDNA-bound Cascade (purple surface) is shown for reference. (B) (Left) CRISPR (cr)RNA–DNA heteroduplex segmented from the dsDNA-bound Cascade structure showing several segments of double-stranded density marked by black lines. (Right) Five-base-pair segments of modeled dsDNA docked into this segmented crRNA–DNA heteroduplex density. (C) CasA density from the dsDNA-bound Cascade reconstruction (DNA-CasA, purple surface) overlaid on the CasA density from the previously reported apo-Cascade cryoEM reconstruction (apo-CasA, green mesh) after alignment based on optimal cross-correlation between the CasC backbones of the two structures. Arrows denote rotation or translation of the four-helix bundle (4-helix bundle) and base (base) of DNA-CasA relative to those domains of apo-CasA. (D) The four-helix bundle of CasA from apo-Cascade (light green surface) was aligned to the four-helix bundle in the dsDNA-bound Cascade (light purple surface) based on optimal cross-correlation. The base of CasA from apo-Cascade (dark green mesh) was transformed based on these alignment parameters. Arrows denote the rotation and translation of the base of DNA-CasA (dark purple surface) still needed to optimally align the bases of these two structures. (E) The four-helix bundle of CasA from apo-Cascade (light green surface) was aligned to the four-helix bundle in the ssRNA-bound Cascade (light gray surface) based on optimal cross-correlation. The base of CasA from apo-Cascade (dark gray mesh) was transformed based on these alignment parameters. There is no additional translation or rotation needed to align the bases, indicating that the entire CasA subunit rotates as a rigid body.

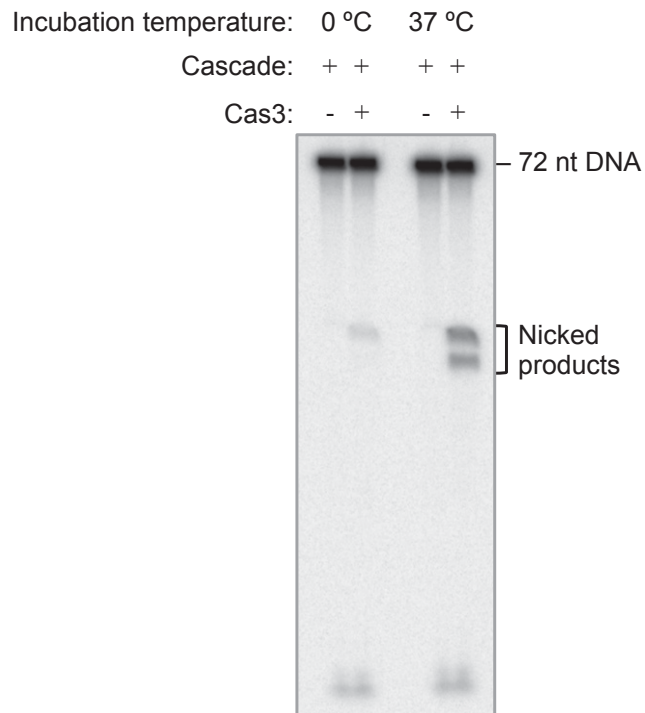

**Fig. S4.** Denaturing gel showing that Cas3 cleavage of a Cascade-bound DNA target is impaired when the reaction is kept on ice (0 °C). [<sup>32</sup>P]DNA (1 nM) was preincubated with 1 μM Cascade at 37 °C before addition of 500 nM maltose-binding protein (MBP)-Cas3. Reactions were incubated either on ice or at 37 °C for 1 h before product resolution on a 10% urea/PAGE gel.

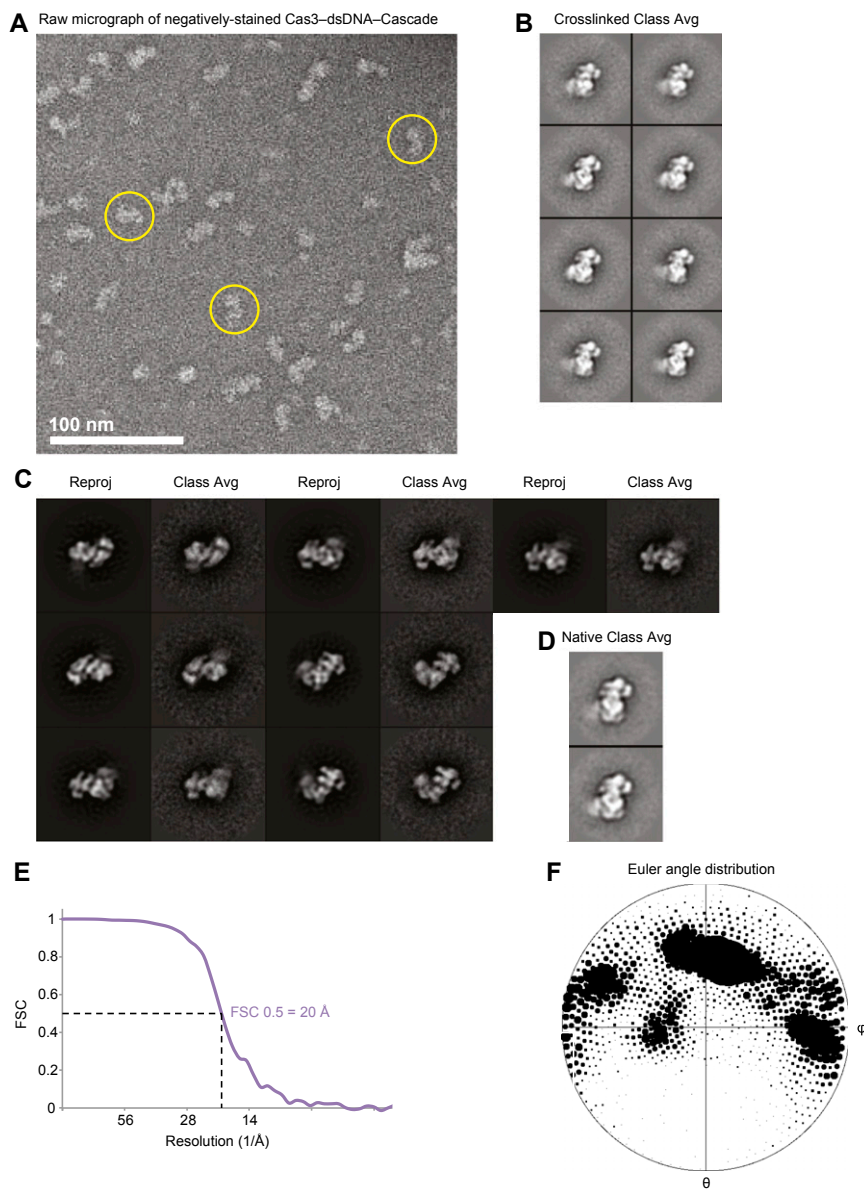

**Fig. S5.** Molecular architecture of Cas3-dsDNA-Cascade. (A) Representative raw untilted micrograph of negatively stained, cross-linked Cas3-dsDNA-Cascade. (Scale bar, 100 nm.) Several particles are outlined with yellow circles. (B) Reference-free 2D class averages of cross-linked Cas3-dsDNA-Cascade include an additional globular density corresponding to Cas3. The width of the boxes is  $\sim 404$  Å. (C) Reference-free 2D class averages of cross-linked Cas3-Cascade-dsDNA (second, fourth, and sixth columns) matched to reprojections of the final reconstruction (first, third, and fifth columns). The width of the boxes is  $\sim 404$  Å. (D) Representative reference-free 2D class averages of native Cas3-dsDNA-Cascade. The width of the boxes is  $\sim 404$  Å. (E) FSC curve for the final reconstruction, showing the resolution to be  $\sim 20$  Å using the 0.5 FSC criterion. (F) Euler angle distribution for the final reconstruction.



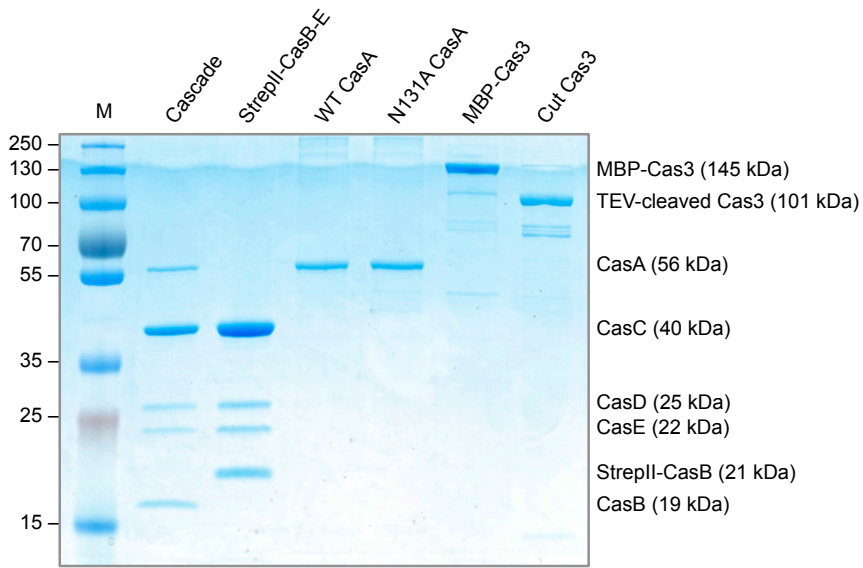

**Fig. S8.** SDS/PAGE depicting all proteins used in this study.





**Table S2. Equilibrium dissociation constants between Cascade and duplexes tested in this study**

| Oligomer pair    | PAM sequence                    | $K_d \pm SD$ , nM |
|------------------|---------------------------------|-------------------|
| MLH-46 + MLH-47  | 3' -TAC-5'<br>   <br>5' -ATG-3' | 0.82 ± 0.14       |
| MLH-46 + MLH-276 | TAC<br>  <br>CTG                | 0.81 ± 0.33       |
| MLH-282 + MLH-47 | TTC<br>  <br>ATG                | 1.0 ± 0.6         |
| MLH-46 + MLH-287 | TAC<br> <br>GAG                 | 30 ± 6            |
| MLH-49 + MLH-250 | TAC                             | 3.8 ± 1.4         |
|                  | CCT                             |                   |

Red text indicates a nucleotide mutation that changes the PAM to a sequence other than one of the four functional motifs.

**Table S3. Plasmids used in this study**

| Plasmid | Name                | Description                                                                                      | Restriction sites | Primers       | Source     |
|---------|---------------------|--------------------------------------------------------------------------------------------------|-------------------|---------------|------------|
| 1       | pWUR547             | R44 CRISPR, 7× spacer number 2 (P7) in pACYCDuet-1 expression vector                             | —                 | —             | (1)        |
| 2       | pWUR480             | <i>casB</i> with N-terminal Strep-tag II, <i>casC</i> , <i>casD</i> in pET-52b expression vector | —                 | —             | (2)        |
| 3       | pWUR404             | <i>casE</i> in pCDF-1b expression vector, no tags                                                | —                 | —             | (2)        |
| 4       | pWUR408             | <i>casA</i> in pRSF-1b expression vector, no tags                                                | —                 | —             | (2)        |
| 5       | EcCasA-pSV272       | WT <i>casA</i> expression vector with N-terminal His <sub>6</sub> -MBP-TEV protease site tag     | —                 | —             | (3)        |
| 6       | EcCasA N131A-pSV272 | N131A <i>casA</i> expression vector with N-terminal His <sub>6</sub> -MBP-TEV protease site tag  | —                 | —             | (3)        |
| 7       | EcCas3-pSV272       | <i>cas3</i> expression vector with N-terminal His <sub>6</sub> -MBP-TEV protease site tag        | KasI + XhoI       | SHS-315 + 316 | This study |

TEV, tobacco etch virus.

- Jore MM, et al. (2011) Structural basis for CRISPR RNA-guided DNA recognition by Cascade. *Nat Struct Mol Biol* 18(5):529–536.
- Brouns SJJ, et al. (2008) Small CRISPR RNAs guide antiviral defense in prokaryotes. *Science* 321(5891):960–964.
- Sashital DG, Wiedenheft B, Doudna JA (2012) Mechanism of foreign DNA selection in a bacterial adaptive immune system. *Mol Cell* 46(5):606–615.
